# Supplementary material
Source: ML conference proceedings conference paper supplement (https://openreview.net/forum?id=nTwb2vBLOV)
Supplement: supplementary_material [file attachment]

# Theano, Pylearn2, libgpuarray Presentation

Frédéric Bastien, Bart van Merriënboer  
Département d'Informatique et de Recherche Opérationnelle  
Université de Montréal  
Montréal, Canada  
`{bastienf, vanmerb}@iro.umontreal.ca`

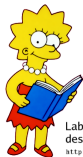

Laboratoire d'Informatique  
des Systèmes Adaptatifs  
<http://www.iro.umontreal.ca/~lisa>

OML Workshop 2014

Université   
de Montréal

## High level

Python <- {NumPy/SciPy/libgpuarray} <- Theano <- Pylearn2

- ▶ Python: OO coding language
- ▶ Numpy:  $n$ -dimensional array object and scientific computing toolbox
- ▶ SciPy: sparse matrix objects and more scientific computing functionality
- ▶ libgpuarray: GPU  $n$ -dimensional array object in C for CUDA and OpenCL
- ▶ Theano: compiler/symbolic graph manipulation
- ▶ Pylearn2: machine learning framework

# Python

- ▶ General-purpose high-level OO interpreted language
- ▶ Emphasizes code readability
- ▶ Comprehensive standard library
- ▶ Dynamic type and memory management
- ▶ Slow execution
- ▶ Easily extensible with C
- ▶ Popular in *web development* and *scientific communities*

## NumPy/SciPy

- ▶ Python floats are full-fledged objects on the heap
  - ▶ Not suitable for high-performance computing!
- ▶ NumPy provides an  $n$ -dimensional numeric array in Python
  - ▶ Perfect for high-performance computing
  - ▶ Slices of arrays are views (no copying)
- ▶ NumPy provides
  - ▶ Elementwise computations
  - ▶ Linear algebra, Fourier transforms
  - ▶ Pseudorandom number generators (many distributions)
- ▶ SciPy provides lots more, including
  - ▶ Sparse matrices
  - ▶ More linear algebra
  - ▶ Solvers and optimization algorithms
  - ▶ Matlab-compatible I/O
  - ▶ I/O and signal processing for images and audio

## What's missing?

- ▶ Non-lazy evaluation (required by Python) hurts performance
- ▶ Bound to the CPU
- ▶ Lacks symbolic or automatic differentiation
- ▶ No automatic speed and stability optimization

# Theano

High-level domain-specific language tailored to numeric computation.

- ▶ Syntax as close to NumPy as possible
- ▶ Compiles most common expressions to C for CPU and/or GPU
- ▶ Limited expressivity means more opportunities optimizations
  - ▶ No subroutines -> global optimization
  - ▶ Strongly typed -> compiles to C
  - ▶ Array oriented -> easy parallelism
  - ▶ Support for looping and branching in expressions
- ▶ Automatic speed and stability optimizations
- ▶ Can reuse other technologies for best performance.
  - ▶ BLAS, SciPy, Cython, Numba, PyCUDA, CUDA
- ▶ Automatic differentiation and R op
- ▶ Sparse matrices

# Pylearn2

Machine Learning library aimed at researchers

- ▶ Built on top of Theano, for fast execution and use of GPU
- ▶ Easy to try variants of implemented algorithms, and to extend them (using Theano)
- ▶ Very modular, each component of the library can be used in isolation
- ▶ Experiments can be specified through a YAML config file, or by a Python script
- ▶ Scripts for visualizing weights, plot monitored values

# libgpuarray

Goal: A common GPU  $n$ -dimensional array that can be reused by all projects, support for both CUDA and OpenCL.

Motivation:

- ▶ Currently there are at least 6 different GPU arrays in Python
  - ▶ CudaNdarray (Theano), GPUArray (pycuda), CUDAMatrix (cudamat), GPUArray (pyopencl), Clyther, Copperhead, ...
  - ▶ There are even more if we include other languages.
- ▶ They are incompatible
  - ▶ None have the same properties and interface
- ▶ All of them implement a subset of numpy.ndarray properties
- ▶ This is the new GPU backend on Theano



## Goal of the stack

**Fast to develop**  
**Fast to run**

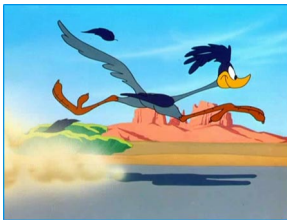

Introduction

Theano

Pylearn2

libgpuarray

Conclusion

## Description

- ▶ Mathematical symbolic expression compiler
- ▶ Expressions mimic NumPy's syntax and semantics
- ▶ Dynamic C/CUDA code generation
  - ▶ C/C++, CUDA, OpenCL, PyCUDA, Cython, Numba, ...
- ▶ Efficient symbolic differentiation
- ▶ Speed and stability optimizations
  - ▶ Gives the right answer for " $\log(1 + x)$ " even if  $x$  is really tiny.
- ▶ Extensive unit-testing and self-verification
- ▶ Works on Linux, OS X and Windows
- ▶ Transparent use of a GPU
  - ▶ float32 only for now (libgpuarray provides much more)
  - ▶ Limited support on Windows
- ▶ Sparse operations (CPU only)

## Simple example

```
import theano
# declare symbolic variable
a = theano.tensor.vector("a")
# build symbolic expression
b = a + a ** 10
# compile function
f = theano.function([a], b)
print f([0, 1, 2])
# prints 'array([0, 2, 1026])'
```

## Simple example: graph optimization

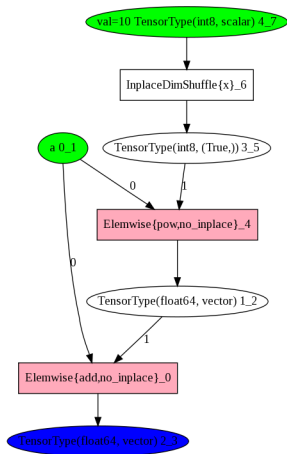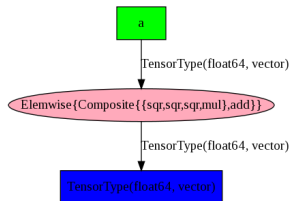

## Project status?

- ▶ Mature: Theano has been developed and used since January 2008 (6.5 yrs old)
- ▶ Driven over 100 research papers
- ▶ Good user documentation
- ▶ Active mailing list with participants from outside our lab
- ▶ Core technology for a few Silicon-Valley start-ups
- ▶ Many contributors (some from outside our lab)
- ▶ Used to teach many university classes
- ▶ Has been used for research at Google and Yahoo.

Theano: [deeplearning.net/software/theano/](http://deeplearning.net/software/theano/)

Deep Learning Tutorials: [deeplearning.net/tutorial/](http://deeplearning.net/tutorial/)

Introduction

Theano

**Pylearn2**

libgpuarray

Conclusion

## Pylearn2 details

The core library contains a collection of:

- ▶ Training algorithms (e.g. Stochastic and Batch GD, model-specific rules)
  - ▶ Costs, supervised/unsupervised and exact/estimated (e.g. NLL, Score matching, NCE)
  - ▶ Monitor, history of (functions of) parameters and hyperparameters on different data sets (training, validation, test)
  - ▶ Termination criteria, determine when to stop training
- ▶ Training extensions, perform actions throughout the training process (e.g., early stopping)
- ▶ Models (e.g. NNets, ConvNets, RBMs, k-means, PCA, SVMs)
- ▶ Datasets (e.g. MNIST, CIFAR-10) and preprocessors (LCN, ZCA)



## Pylearn2 details, continued

- ▶ Data specifications which give semantics to data
  - ▶ IndexSpace, 1D integer array e.g. for labels
  - ▶ VectorSpace, 1D float array e.g. for softmax output
  - ▶ Conv2DSpace, 3D float32 arrays e.g. for color image input
- ▶ Allows for automatic conversion when needed e.g. labels to one-hot vectors, images to flattened vectors
- ▶ YAML file allows experiments to be conducted without writing code

## Project status

- ▶ Has been used for scientific publications, Kaggle competitions, used by many researchers at LISA
- ▶ Still under rapid development, however the API shouldn't break without warning
- ▶ Documentation is incomplete, but quickly improving
- ▶ Active mailing list with participants from outside our lab
- ▶ Core technology for a least one Silicon-Valley start-up
- ▶ Features currently in development:
  - ▶ Recurrent neural networks (RNNs), based on the GroundHog framework developed at LISA
  - ▶ Better hyperparameter search support, using e.g. Hyperopt

Introduction

Theano

Pylearn2

**libgpuarray**

Conclusion

## libgpuarray: Design Goals

- ▶ Have the base object in C to allow collaboration with more projects.
  - ▶ We want people from C, C++, ruby, R, ... all use the same base GPU ndarray.
- ▶ Be compatible with CUDA and OpenCL.
- ▶ Not too simple, (don't support just matrix).
- ▶ Support all dtype.
- ▶ Allow strided views.
- ▶ But still easy to develop new code that support only a few memory layout.
  - ▶ This ease the development of new code.

## Project status?

- ▶ Usable directly, but not all implementation available.
- ▶ Multiple GPUs works.
- ▶ Is the next GPU array container for Theano and is working.
  - ▶ Not all Theano implementations available now.
  - ▶ OpenCL misses more implementations.
  - ▶ Multiple GPUs on the way.
- ▶ Web site:  
<http://deeplearning.net/software/libgpuarray/>

Introduction

Theano

Pylearn2

libgpuarray

Conclusion

## Conclusion

Theano/Pylearn2/libgpuarray provide an environment for machine learning that is: **Fast to develop**

**Fast to run**

## Acknowledgments

- ▶ All people working or having worked at the LISA lab.
- ▶ All Theano/Pylearn 2 users/contributors
- ▶ Compute Canada, RQCHP, NSERC, and Canada Research Chairs for providing funds or access to compute resources.



# Questions?
